# Supplementary material
Source: publisher figshare collection journal article supplement (https://tandf.figshare.com/articles/dataset/_/5919469)
Supplement: Supplementary file 1 [file 1]

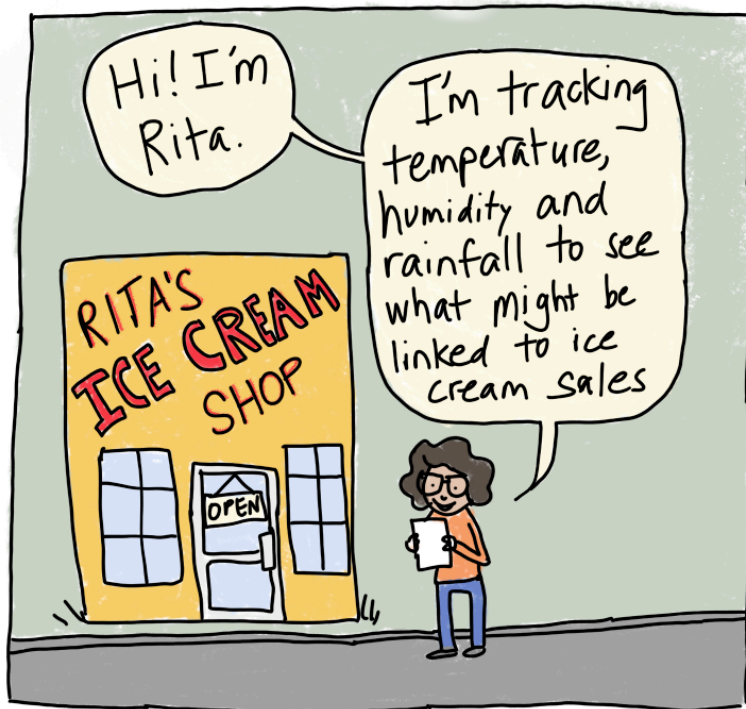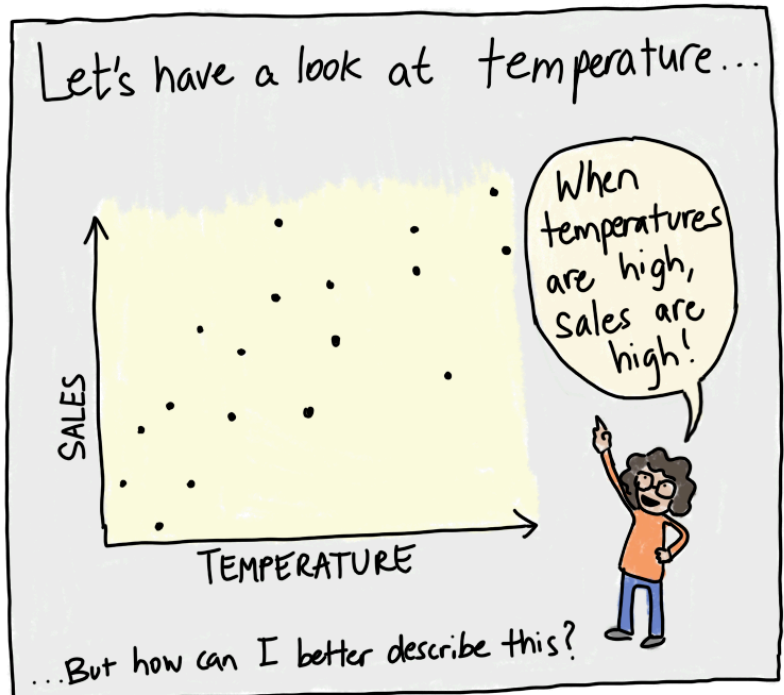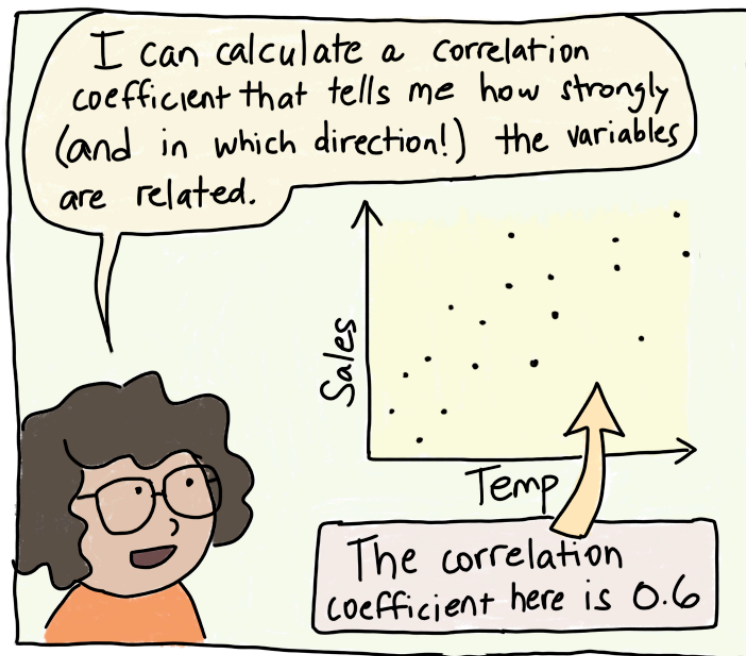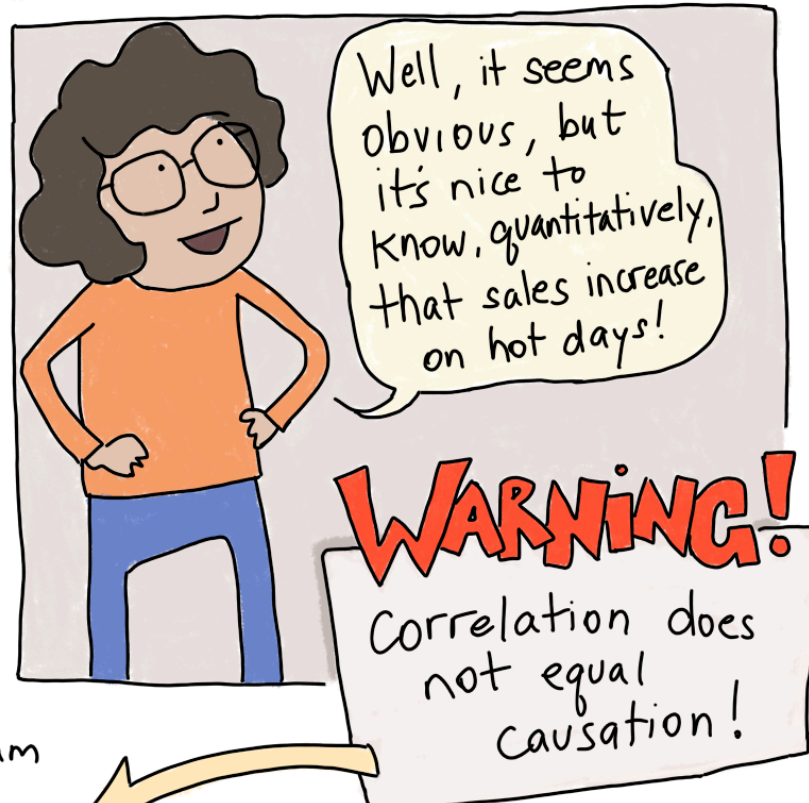

For example, ice cream sales have correlated with murders, but ice cream does not cause people to be murderous!
